# Supplementary material
Source: publisher site journal article supplement (https://www.dovepress.com/get_supplementary_file.php?f=372543.docx)
Supplement: Supplementary file 1 [file get_supplementary_file.php]

***Supplementary Information***

**Supplementary Figure**


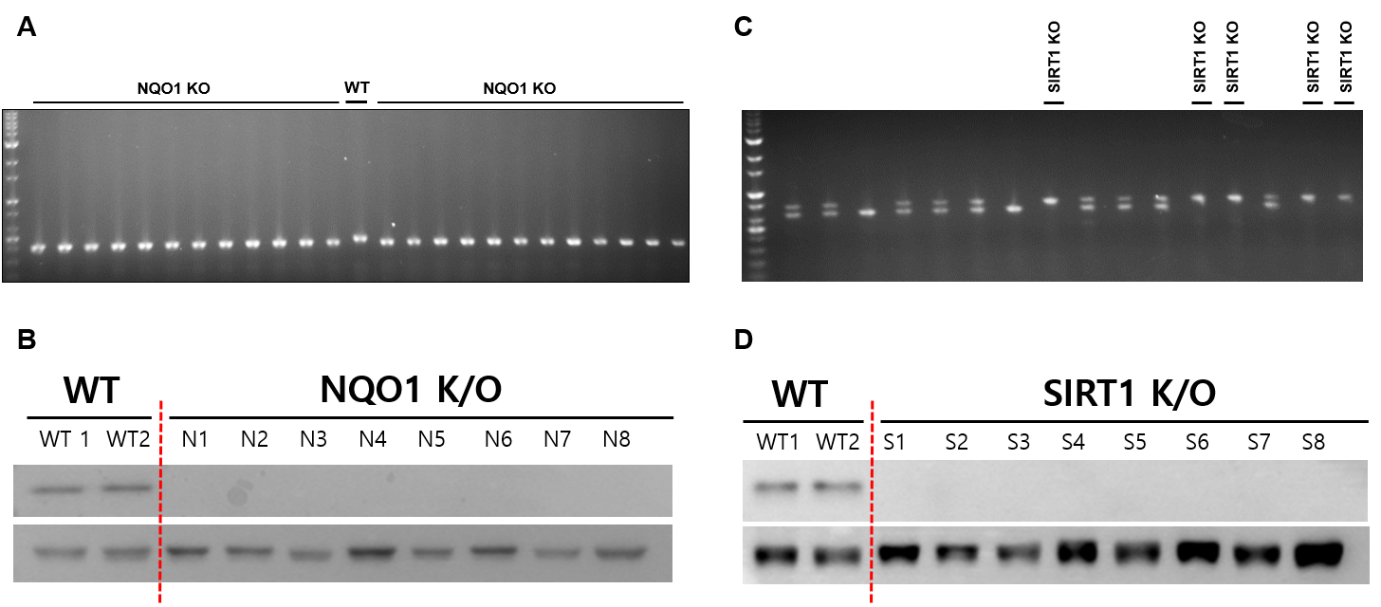


**Supplementary Figure S1.** knockout validation of NQO1 and SIRT1 KO mice. (A) The genotypes of NQO1 KO mice were confirmed by PCR, and its products were represented in 450 bp for WT and 400 bp for KO. (B) Western blot analysis was performed to investigate NQO1 protein levels in mouse skin tissues. Ablation of the NQO1 protein was detected in the skin tissue of NQO1 KO mice. (C) The genotypes of SIRT1 KO mice were confirmed by PCR, and its products were represented in 600 bp for WT and 700 bp for KO. (D) Western blot analysis was performed to investigate SIRT1 protein levels in mouse skin tissues. Ablation of the SIRT1 protein was detected in the skin tissue of SIRT1 KO mice.
